# Supplementary material for: FDXR-Associated Oculopathy: Congenital Amaurosis and Early-Onset Severe Retinal Dystrophy as Common Presenting Features in a Chinese Population
Source: MDPI journal article supplement (doi:10.3390/genes14040952), 2023-04-21
Supplement: s1 [file s1]

**Supplementary Table S2.** The classification of variants in FDXR identified in our study based on ACMG/AMP criteria.

| Variant ID | Nucleotide change | Effect  | ACMG/AMP                          |                |
|------------|-------------------|---------|-----------------------------------|----------------|
|            |                   |         | Evidence                          | Classification |
| M1         | c.578G>A          | p.R193H | PS1, PS4, PM5, PP1, PP2, PP3, PP4 | P              |
| M2         | c.235C>T          | p.R79C  | PS4, PP1, PP2, PP3, PP4           | LP             |
| M3         | c.310C>T          | p.R104C | PS4, PP1, PP2, PP3, PP4           | LP             |
| M4         | c.400G>A          | p.G134R | PS4, PP1, PP2, PP3, PP4           | LP             |
| M5         | c.917G>A          | p.R306H | PS4, PM5, PP1, PP2, PP4           | LP             |
| M6         | c.463C>T          | p.R115G | PS4, PP2, PP3, PP4                | LP             |
| M7         | c.698A>G          | p.Q233R | PS4, PP2, PP3, PP4                | LP             |
| M8         | c.682C>T          | p.R228W | PS4, PM5, PP2, PP3                | LP             |
| M9         | c.940G>T          | p.V314L | PS1, PS4, PM5, PP1, PP2, PP4      | P              |
| M10        | c.343A>G          | p.R115G | PM2, PP1, PP2, PP4                | LP             |
| M11        | c.974G>A          | p.G325D | PM2, PP1, PP2, PP3, PP4           | P              |
| M12        | c.695T>C          | p.L232P | PM2, PP1, PP2, PP3, PP4           | P              |
| M13        | c.823C>T          | p.R275W | PS1, PS4, PM5, PP1, PP2, PP3, PP4 | P              |
| M14        | c.1194G>T         | p.W398C | PM2, PP1, PP2, PP3, PP4           | P              |
