# Supplementary material for: FDXR-Associated Oculopathy: Congenital Amaurosis and Early-Onset Severe Retinal Dystrophy as Common Presenting Features in a Chinese Population
Source: MDPI journal article supplement (doi:10.3390/genes14040952), 2023-04-21
Supplement: s1 [file s1]

Supplementary Table S3. Biallelic potential pathogenic *FDXR* variants in this and previous studies

| Nucleotide     | Effect             | Bioinformatic prediction tools |       |      |           |         |                   | gnomAD    | Reported                |
|----------------|--------------------|--------------------------------|-------|------|-----------|---------|-------------------|-----------|-------------------------|
| change         |                    | CADD                           | REVEL | SIFT | Polyphen2 | PROVEAN | fathmm MKL coding | Frequency | in                      |
| c.1 A>G        | p.M1?              | 21.9                           | /     | /    | /         | /       | /                 | /         | Previous study          |
| c.1058G>A      | p.Cys353Tyr        | 27.2                           | 0.620 | DA   | PRD       | DE      | DE                | 6/282632  | Previous study          |
| c.1102G>A      | p.Asp368Asn        | 24.8                           | 0.153 | DA   | POD       | DE      | DE                | 2/251302  | Previous study          |
| c.1115C>A      | p.Pro372His        | 26.2                           | 0.492 | DA   | POD       | DE      | DE                | 4/282602  | Previous study          |
| c.1156C>T      | p.Arg386Trp        | 32.0                           | 0.530 | DA   | PRD       | DE      | DE                | 45/250556 | Previous study          |
| c.1189G>A      | p.Gly397Ser        | 28.8                           | 0.842 | DA   | PRD       | DE      | DE                | 10/278128 | Previous study          |
| c.1194G>T      | p.Trp398Cys        | 31                             | 0.533 | DA   | PRD       | DE      | DE                | /         | /                       |
| c.1208C>T      | p.Pro403Leu        | 27.6                           | 0.462 | DA   | PRD       | DE      | DE                | 3/248366  | Previous study          |
| c.1255C>T      | p.Glu419*          | 41.0                           | /     | /    | /         | /       | /                 | /         | Previous study          |
| c.1279G>C      | p.Ala427Pro        | 20.2                           | 0.132 | T    | B         | N       | N                 | 2/249648  | Previous study          |
| c.1309G>A      | p.Gly437Ser        | 25.5                           | 0.206 | DA   | POD       | DE      | DE                | /         | Previous study          |
| c.1309G>T      | p.Gly437Cys        | 25.9                           | 0.380 | DA   | PRD       | DE      | DE                | /         | Previous study          |
| c.1343G>A      | p.Arg448Gln        | 32.0                           | 0.243 | DA   | PRD       | DE      | DE                | 2/246380  | Previous study          |
| c.1429 G>A     | p.Glu477Lys        | 24.7                           | 0.220 | DA   | PRD       | DE      | DE                | /         | Previous study          |
| c.151T>C       | p.Phe51Leu         | 25.0                           | 0.585 | DA   | PRD       | DE      | DE                | /         | Previous study          |
| c.221C>T       | p.Pro74Leu         | 25.5                           | 0.596 | DA   | PRD       | DE      | DE                | 4/250916  | Previous study          |
| c.235C>T       | p.Arg79Cys         | 29.0                           | 0.653 | DA   | PRD       | DE      | DE                | 2/250924  | This study              |
| c.250C>T       | p.Pro84Ser         | 24.1                           | 0.766 | DA   | PRD       | DE      | DE                | /         | Previous study          |
| c.310C>T       | p.Arg104Cys        | 31.0                           | 0.517 | DA   | PRD       | DE      | DE                | 16/281296 | This study              |
| c.325G>A       | p.Gly109Ser        | 28.5                           | 0.447 | DA   | PRD       | DE      | DE                | 1/250090  | Previous study          |
| c.332T>C       | p.Val111Ala        | 26.8                           | 0.568 | DA   | PRD       | DE      | DE                | /         | Previous study          |
| c.343A>G       | p.Arg115Gly        | 23.6                           | 0.409 | T    | B         | DE      | DE                | /         | This study              |
| c.35C>G        | p.Ser12Trp         | 23.2                           | 0.104 | DA   | POD       | N       | N                 | /         | Previous study          |
| c.400G>A       | p.Gly134Arg        | 29.7                           | 0.818 | DA   | PRD       | DE      | DE                | 1/249762  | This study              |
| c.427A>T       | p.Ile143Phe        | 22.7                           | 0.199 | DA   | PRD       | DE      | DE                | /         | Previous study          |
| c.461C>T       | p.Ala154Val        | 24.4                           | 0.562 | DA   | PRD       | DE      | DE                | /         | Previous study          |
| c.463C>T       | p.Arg155Trp        | 24.4                           | 0.545 | DA   | PRD       | DE      | DE                | 4/282390  | This and previous study |
| c.472G>A       | p.Val158Met        | 26.2                           | 0.456 | DA   | PRD       | DE      | DE                | 2/250992  | Previous study          |
| c.564_575del12 | p.Leu189_Ala192del | /                              | /     | /    | /         | /       | /                 | /         | Previous study          |
| c.577C>T       | p.Arg193Cys        | 27.0                           | 0.841 | DA   | PRD       | DE      | DE                | 5/248686  | Previous study          |
| c.578G>A       | p.Arg193His        | 31.0                           | 0.896 | DA   | PRD       | DE      | DE                | 4/248218  | This and previous study |
| c.613A>G       | p.Thr205Ala        | 26.5                           | 0.757 | DA   | PRD       | DE      | DE                | /         | Previous study          |
| c.614C>T       | p.Thr205Met        | 29.8                           | 0.736 | DA   | PRD       | DE      | DE                | 3/251230  | Previous study          |
| c.616G>C       | p.Asp206His        | 32.0                           | 0.818 | DA   | PRD       | DE      | DE                | /         | Previous study          |
| c.619A>T       | p.Ile207Phe        | 29.5                           | 0.820 | DA   | PRD       | DE      | DE                | /         | Previous study          |
| c.632C>T       | p.Ala211Val        | 29.1                           | 0.387 | DA   | POD       | DE      | DE                | /         | Previous study          |
| c.643C>G       | p.Leu215Val        | 31.0                           | 0.534 | DA   | PRD       | DE      | DE                | /         | Previous study          |
| c.682C>T       | p.Arg228Trp        | 32                             | 0.793 | DA   | PRD       | DE      | DE                | 4/251200  | Previous study          |
| c.683G>T       | p.Arg228Leu        | 32.0                           | 0.821 | DA   | PRD       | DE      | DE                | 4/251208  | Previous study          |
| c.695T>C       | p.Leu232Pro        | 29.8                           | 0.776 | DA   | POD       | DE      | DE                | /         | This study              |

|           |              |      |       |    |     |    |    |           |                         |
|-----------|--------------|------|-------|----|-----|----|----|-----------|-------------------------|
| c.698A>G  | p.Gln233Arg  | 26.5 | 0.604 | DA | POD | DE | DE | 2/251196  | This study              |
| c.724C>T  | p.Arg242Trp  | 32.0 | 0.559 | DA | PRD | DE | DE | 1/31338   | Previous study          |
| c.820A>T  | p.Lys274*    | 44.0 | /     | /  | /   | /  | /  | /         | Previous study          |
| c.823C>T  | p.Arg275Trp  | 24.3 | 0.336 | DA | PRD | DE | DE | 2/221422  | This and previous study |
| c.916C>T  | p.Arg306Cys  | 24.7 | 0.208 | DA | POD | DE | DE | 7/241968  | Previous study          |
| c.917G>A  | p.Arg306His  | 22.8 | 0.196 | T  | B   | DE | DE | 2/242172  | This study              |
| c.925C>T  | p.(Arg309*)1 | 41.0 | /     | /  | /   | /  | /  | /         | Previous study          |
| c.929delG | p.S316Tfs*19 | /    | /     | /  | /   | /  | /  | /         | Previous study          |
| c.940G>T  | p.Val314Leu  | 22.5 | 0.130 | T  | B   | N  | DE | 18/274502 | This and previous study |
| c.974G>A  | p.Gly325Asp  | 24.1 | 0.213 | DA | B   | DE | DE | 2/251196  | This study              |
| c.979C>A  | p.Arg327Ser  | 25.3 | 0.350 | DA | POD | DE | DE | /         | Previous study          |

Note: REVEL = Rare Exome Variant Ensemble Learner, CADD = Combined Annotation Dependent Depletion, SIFT = Sorting Intolerant From Tolerant,

PolyPhen-2 = Polymorphism Phenotyping version 2, PROVEAN = Protein Variation Effect Analyzer, fathmm-MKL = Functional Analysis through Hidden Markov

Models - Multiple Kernel Learning, DA=Damaging, T=Tolerated, PRD=Probably damaging, B=Benign, POD=Possibly damaging, DE=Deleterious, N=Neutral,

DC=Disease causing
